# Supplementary material for: Utility of 3-Acetyl-6-bromo-2H-chromen-2-one for the Synthesis of New Heterocycles as Potential Antiproliferative Agents
Source: MDPI journal article supplement (doi:10.3390/molecules201219803), 2015-12-04
Supplement: s1 [file s1]

# Supplementary Materials: Utility of 3-Acetyl-6-bromo-2*H*-chromen-2-one for Synthesis of New Heterocycles as Potential Antiproliferative Agents

Sobhi M. Gomha, Yasser H. Zaki and Abdou O. Abdelhamid

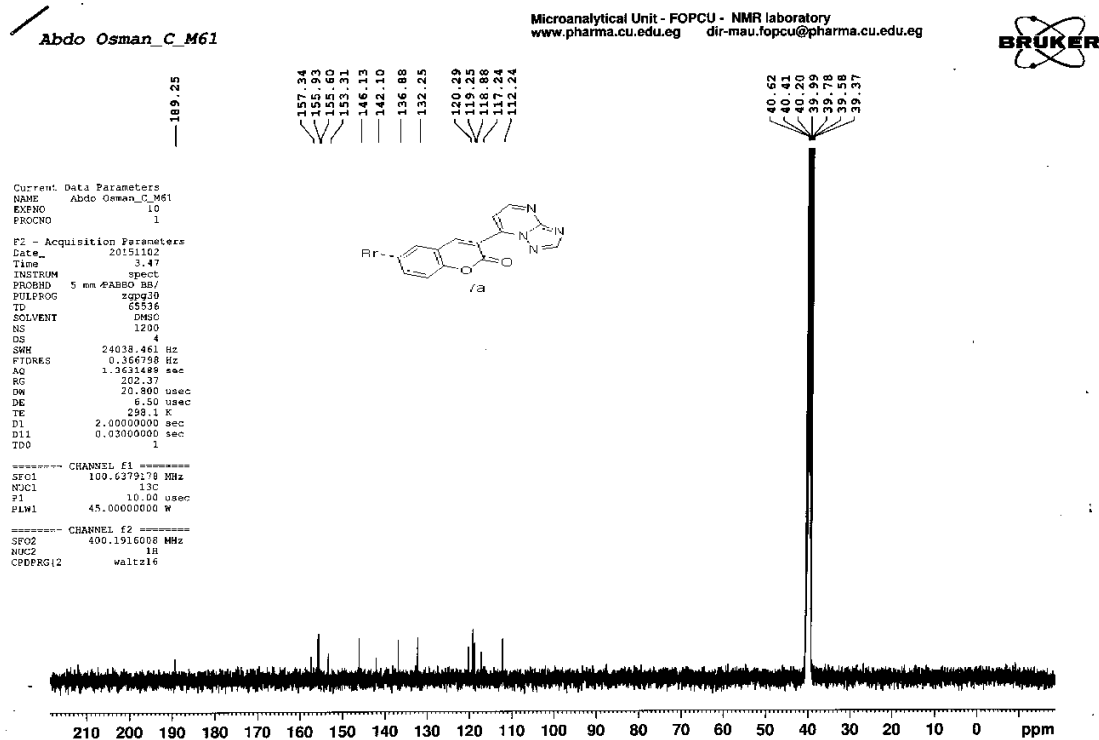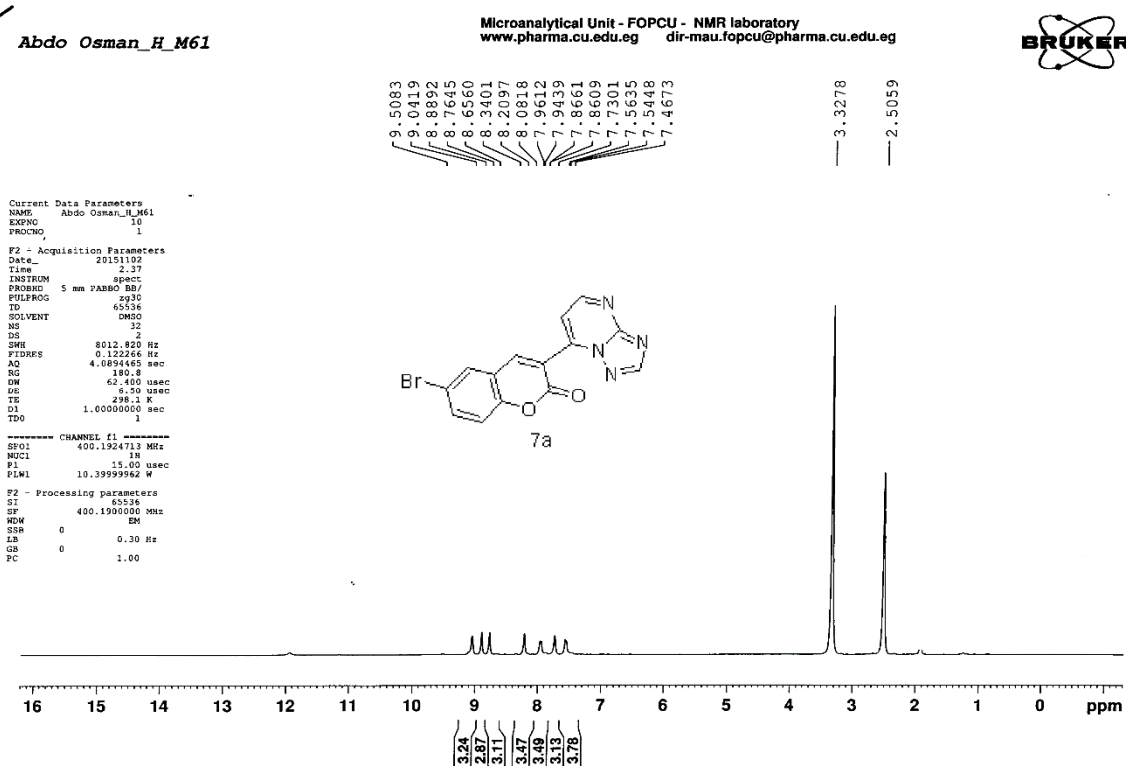

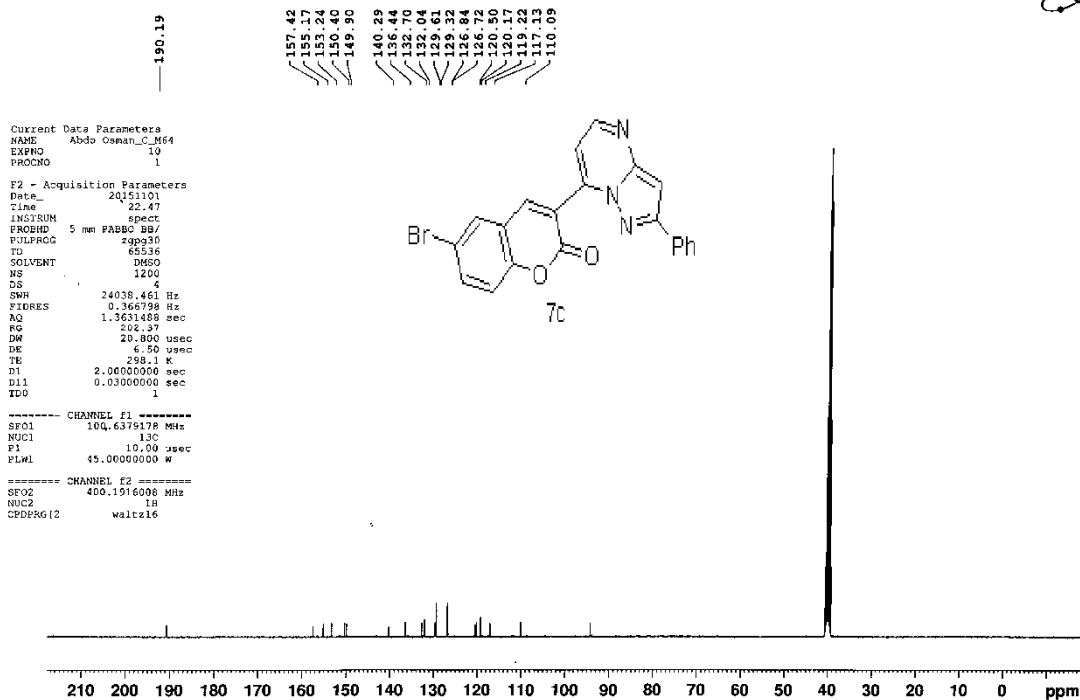

Figure S3. <sup>13</sup>C-NMR Spectrum of compound 7c.

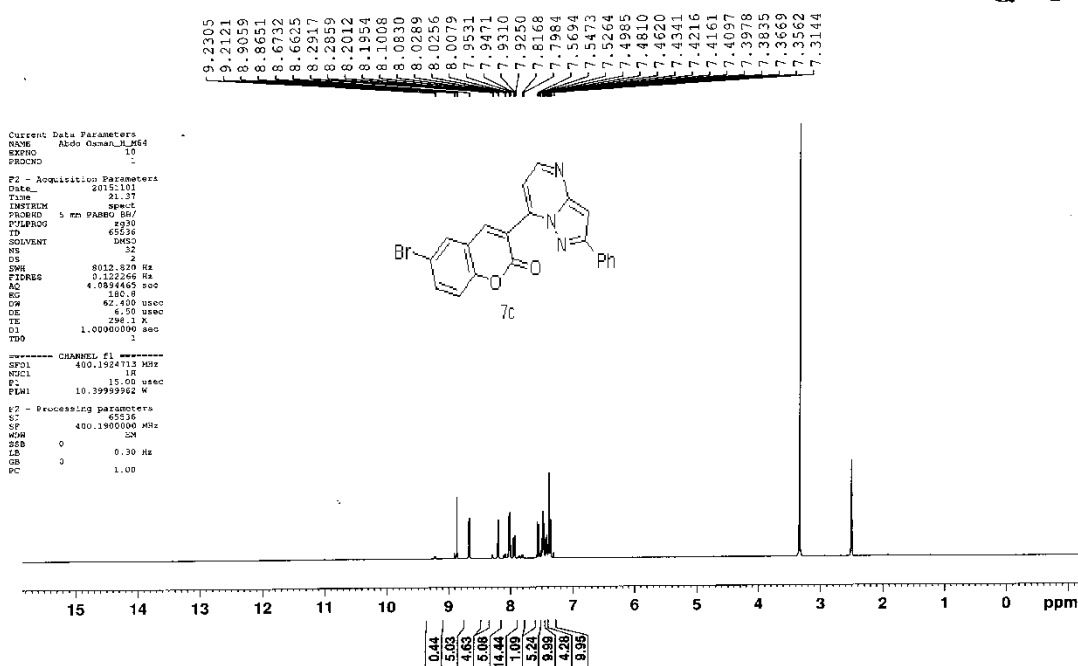

Figure S4. <sup>1</sup>H-NMR Spectrum of compound 7c.

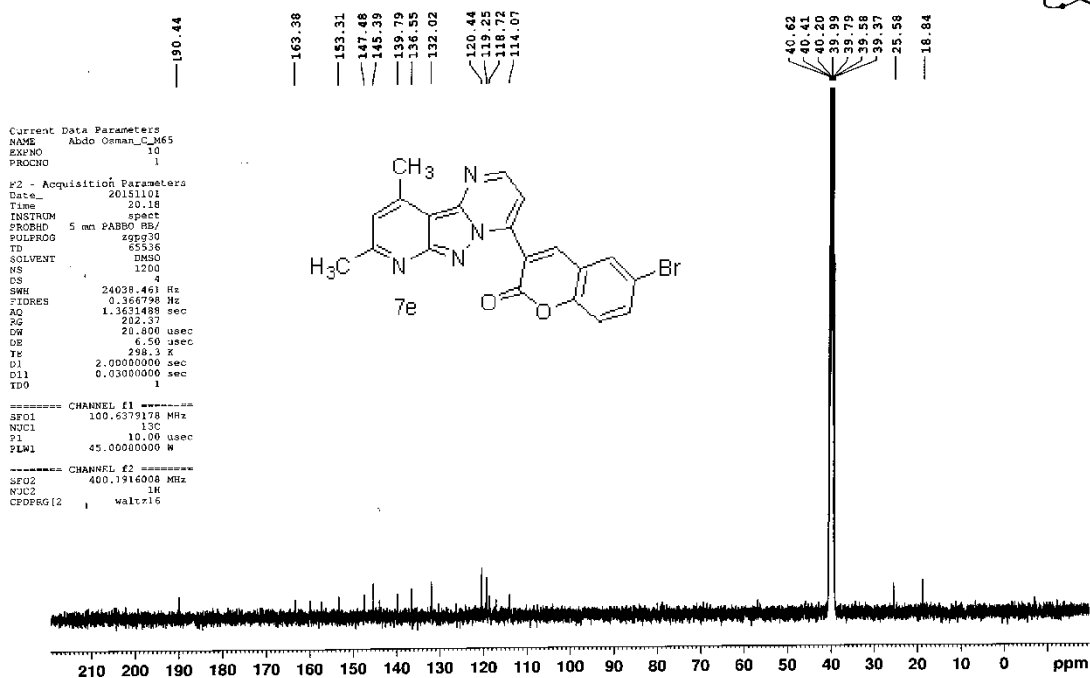

Figure S5. <sup>13</sup>C-NMR Spectrum of compound 7e.

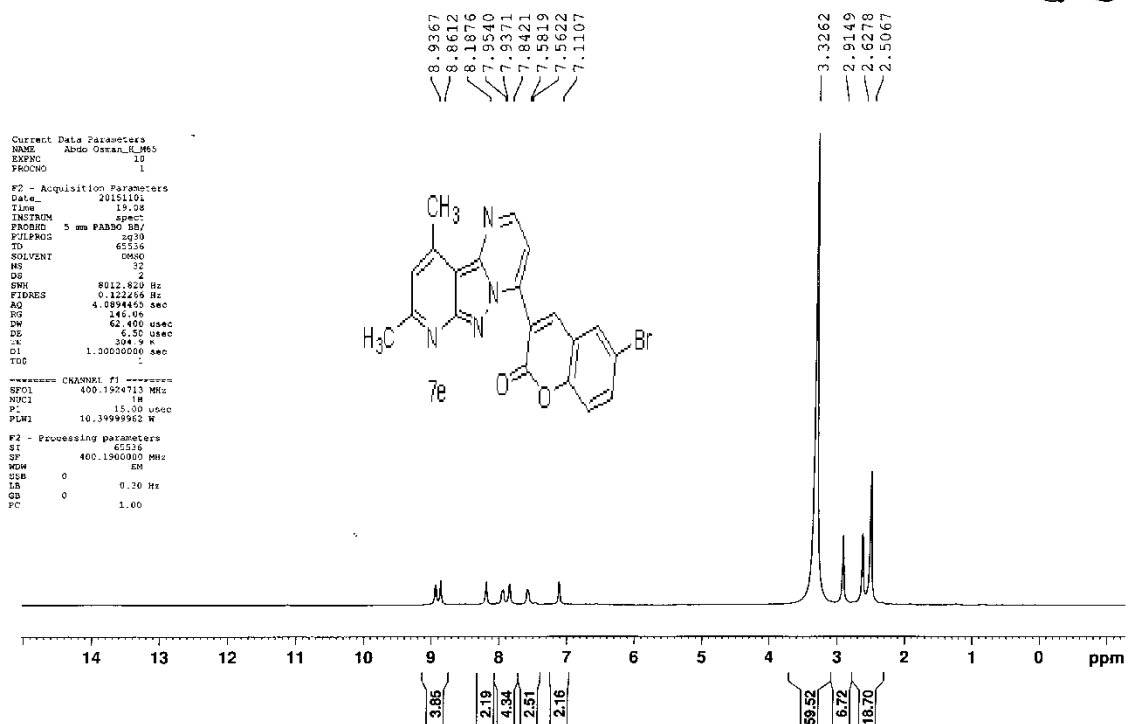

Figure S6. <sup>1</sup>H-NMR Spectrum of compound 7e.

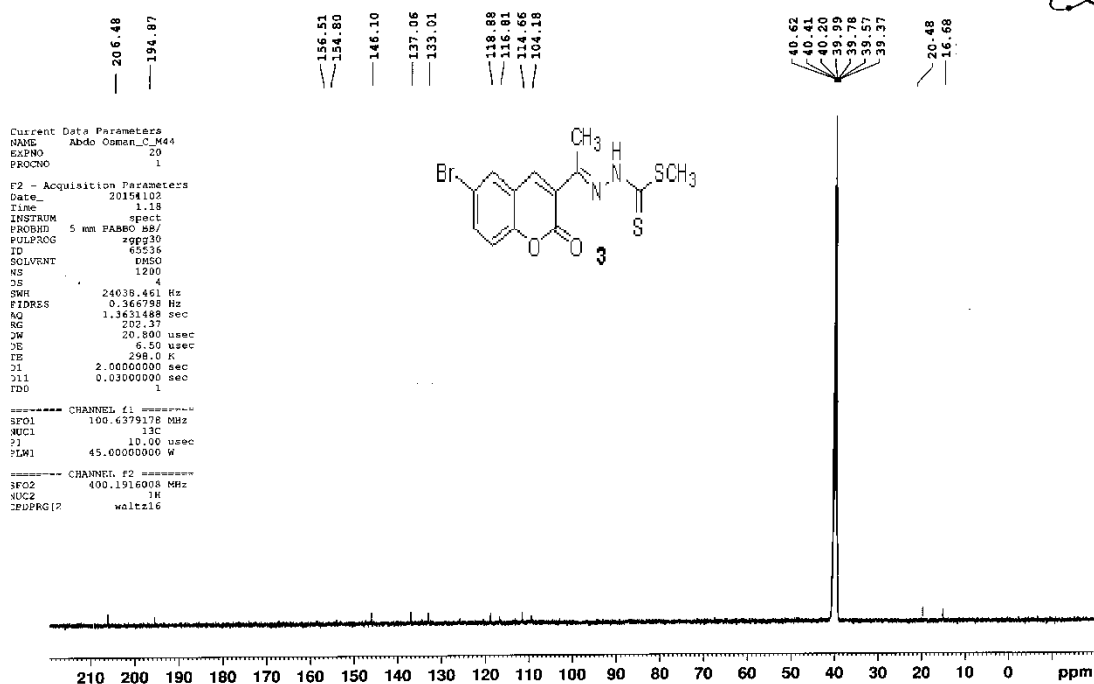Figure S7. <sup>13</sup>C-NMR Spectrum of compound 3.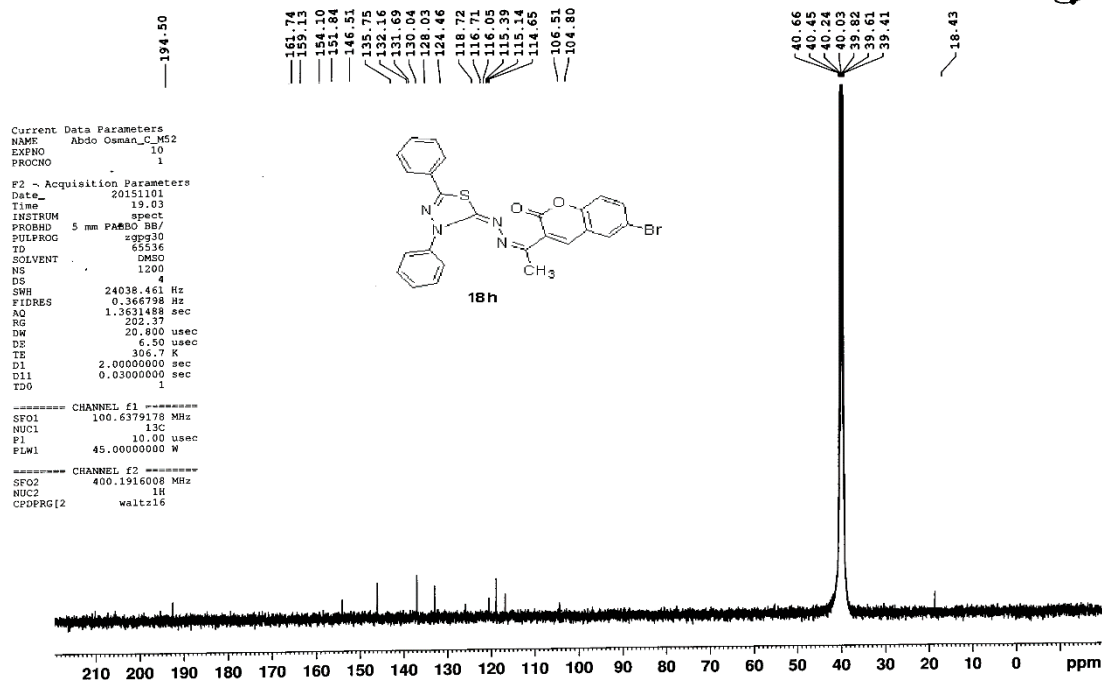Figure S8. <sup>13</sup>C-NMR Spectrum of compound 18h.

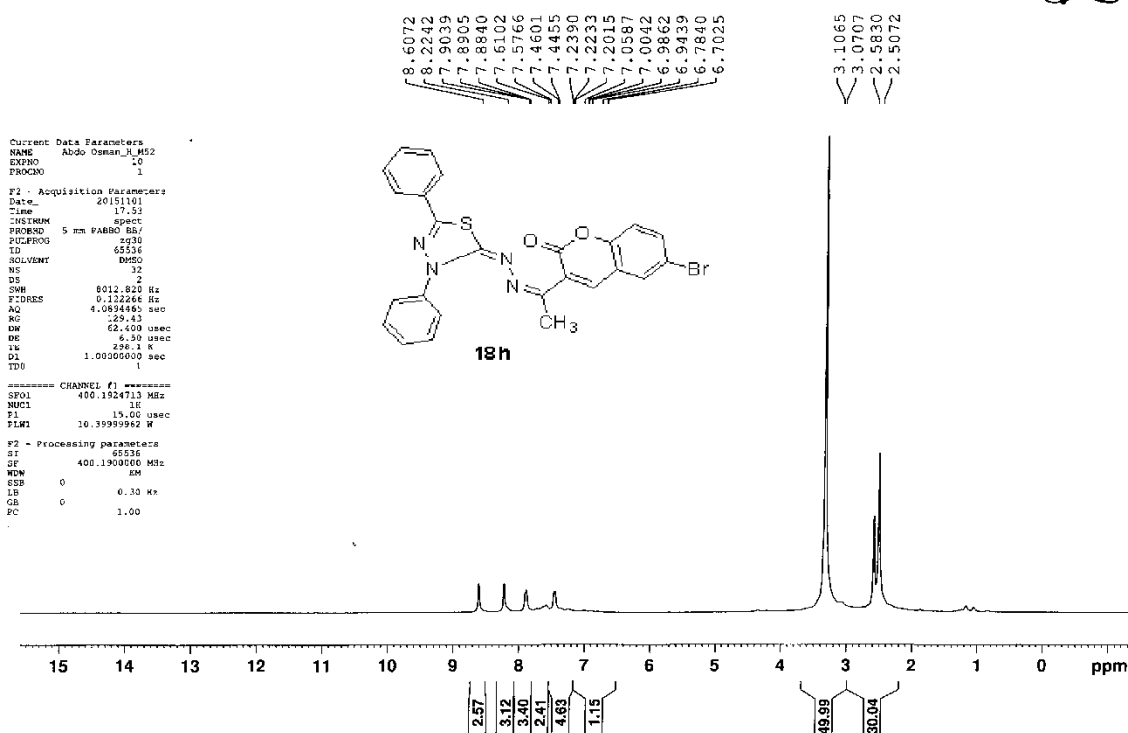Figure S9. <sup>1</sup>H-NMR Spectrum of compound 18h.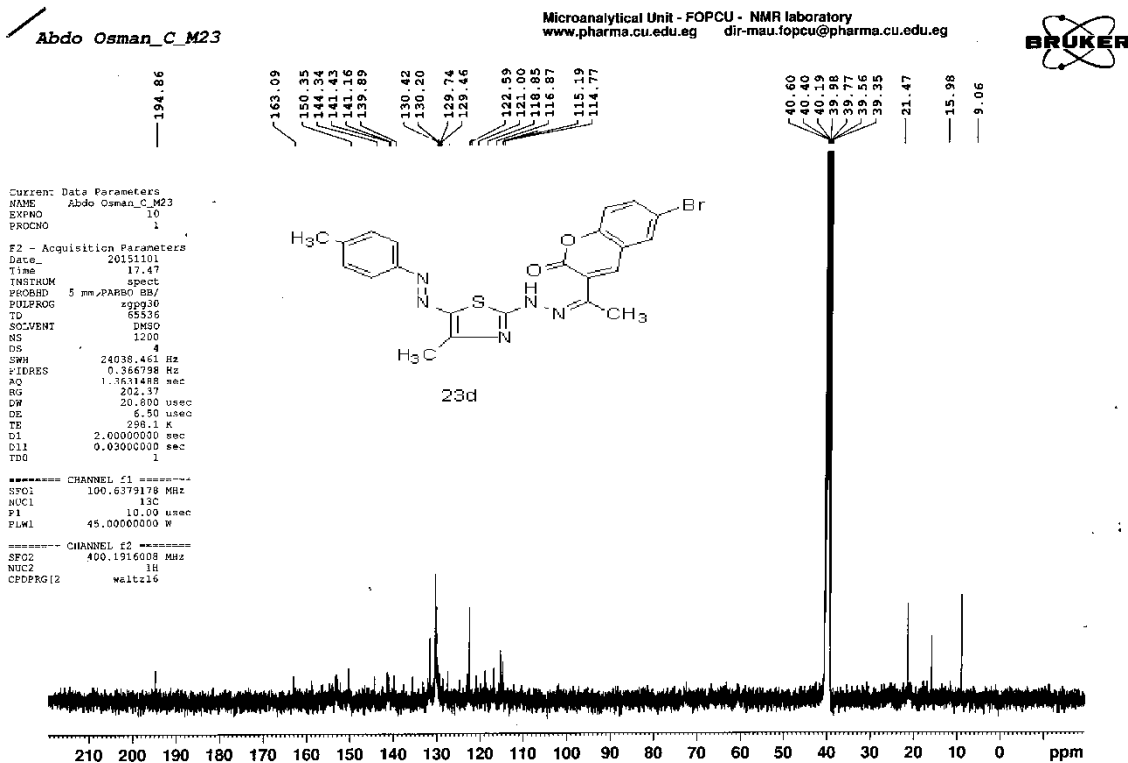Figure S10. <sup>13</sup>C-NMR Spectrum of compound 23d.

Abdo Osman\_H\_M23

Microanalytical Unit - FOPCU - NMR laboratory  
www.pharma.cu.edu.eg dir-mau.fopcu@pharma.cu.edu.eg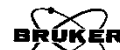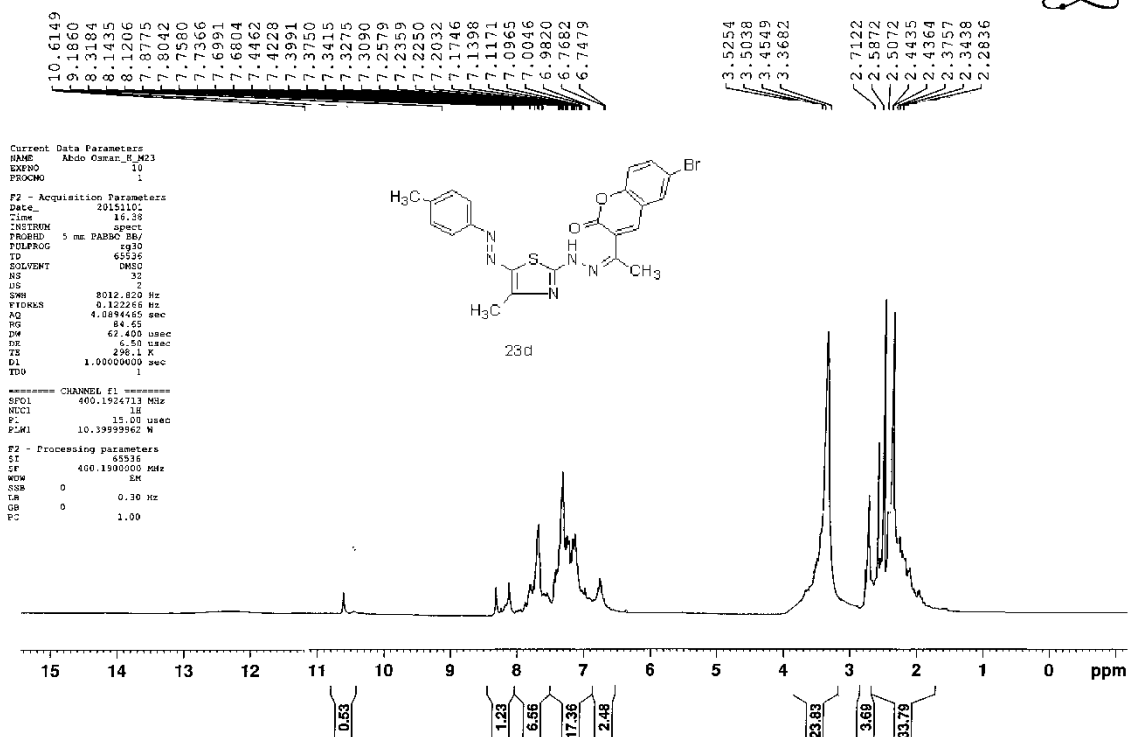Figure S11. <sup>1</sup>H-NMR Spectrum of compound 23d.

Abdo Osman\_C\_M26

Microanalytical Unit - FOPCU - NMR laboratory  
www.pharma.cu.edu.eg dir-mau.fopcu@pharma.cu.edu.eg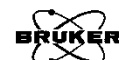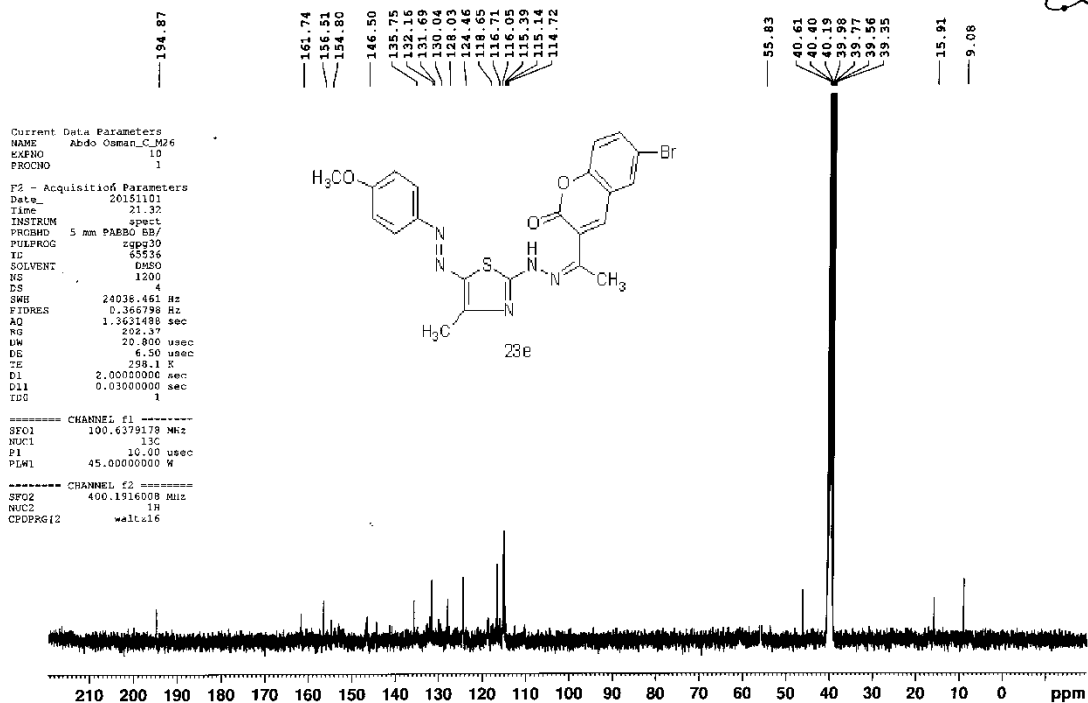Figure S12. <sup>13</sup>C-NMR Spectrum of compound 23e.

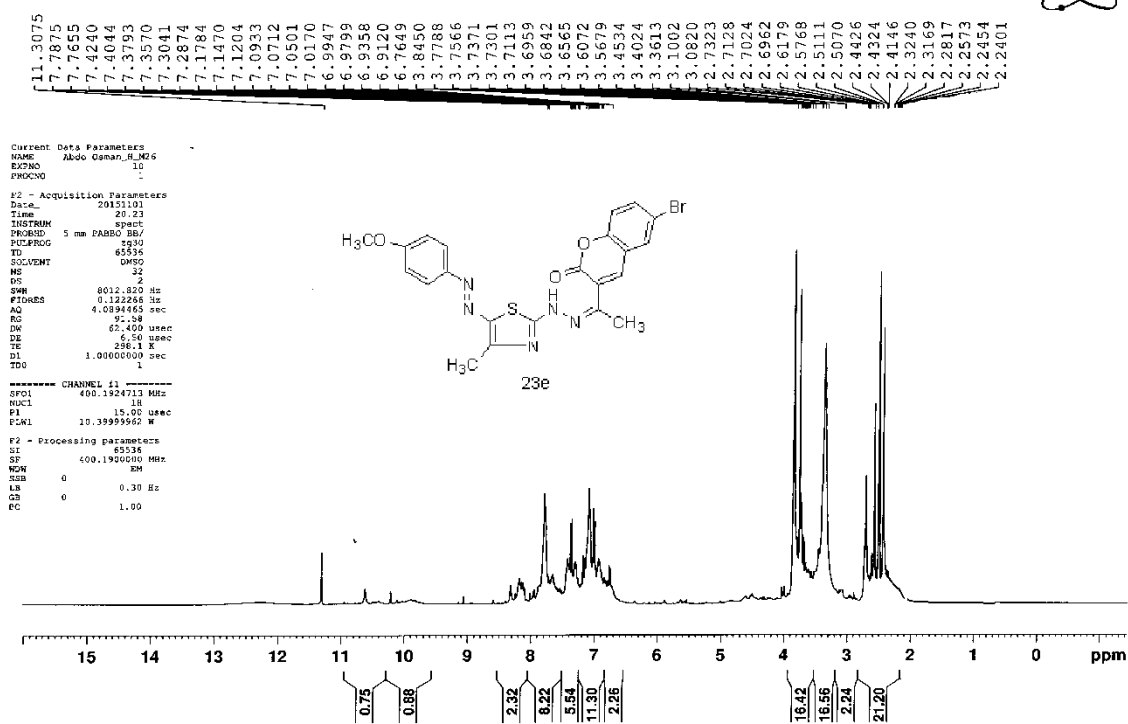Figure S13. <sup>1</sup>H-NMR Spectrum of compound 23e.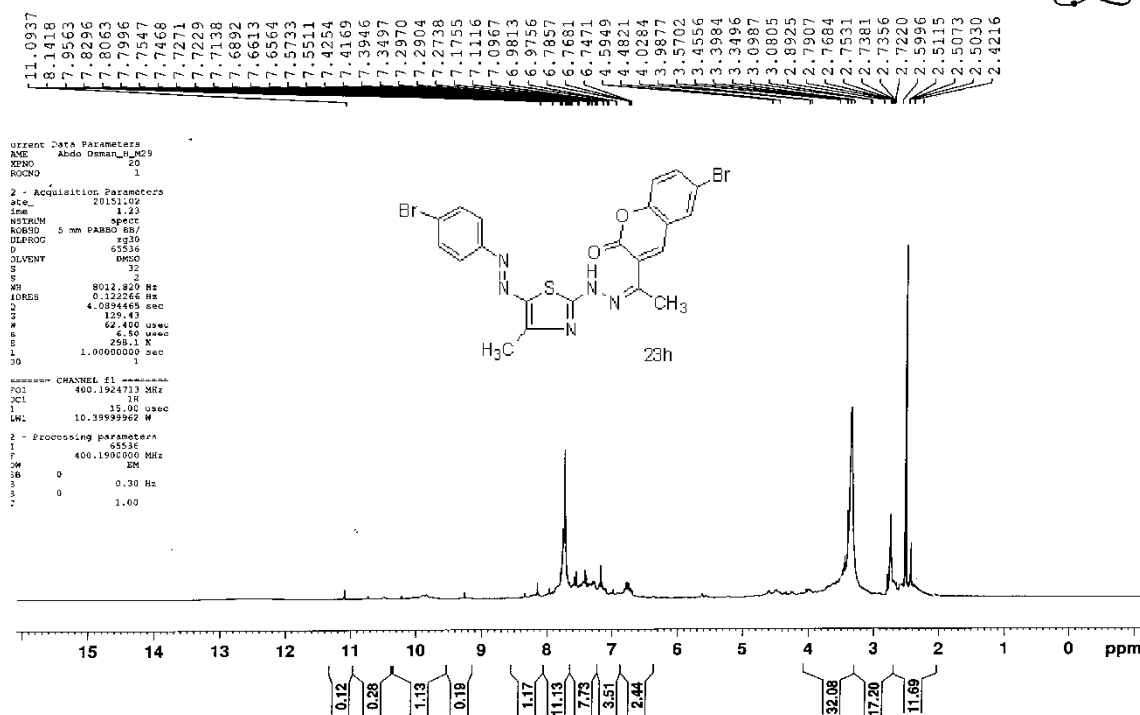Figure S14. <sup>1</sup>H-NMR Spectrum of compound 23h.
